# Supplementary material for: Analysing Impacts of RFID in Supply Chains Using Joint Economic Lot Size Models
Source: Royal Society of Chemistry journal article supplement (doi:10.1039/c9nr10939k), 2007-01-01
Supplement: c9nr10939k1.pdf [file c9nr10939k1.pdf]

## Supporting information

### **Non-Surfactant Self-Templating Strategy for Mesoporous Silica Nanospheres : beyond the Stöber Method**

Zhe Chen, Bo Peng, Jia-Qiong Xu, Xue-Chen Xiang, Dong-Fang Ren, Tai-Qun Yang, Shi-Yu Ma\*, Kun Zhang\* and Qi-Ming Chen\*

School of Chemistry and Molecular Engineering, Shanghai Key Laboratory of Green Chemistry and Chemical Processes, East China Normal University, Shanghai 200062, P. R. China.

#### **Experiment section:**

**Materials.** tetraethoxysilane (TEOS, Richjoint Chemical, 28.4%), aqueous ammonia (Enox, 25-28%), ethanol (EtOH, SCR, 99.7%), Ultrapure water with a resistivity higher than 18.2 MΩ cm was used in all experiments. All chemicals were analytic grade and used without further purification.

**Synthesis of normal SiO<sub>2</sub> nanoparticles using Stöber method.** Normal SiO<sub>2</sub> nanoparticles were prepared using a typical modified Stöber method. In a typical synthesis of 270 nm SiO<sub>2</sub> nanoparticles, 21.6 mL of water, 9 mL of ammonia solution, and 19.4 mL of ethanol were mixed. After the mixture was vigorously stirred for 20 min at 40°C to form a homogeneous solution, the mixture of 4.5 mL of TEOS and 45.5mL ethanol was quickly added. The resulting mixture was again vigorously stirred at 40°C for 2.5h. For comparison, the resulting Stöber colloids were also treated by soft etching process.

**Characterization.** The SEM and TEM images were taken using Hitachi S-4800 microscope and JEOL-JEM- 2100 microscope, respectively. Nitrogen adsorption-desorption isotherms were obtained at 77 K on a BEL SORP after activating the sample under vacuum at 573K for 6 hours. <sup>29</sup>Si solid-state CP-MAS NMR measurements were obtained on a VARIAN VNMRS-400WB spectrometer. For <sup>29</sup>Si (79.5 MHz), a 4 μs ( $h = \pi/2$ ) pulse was used with a repetition time of 360 s.

#### **Experiment results:**

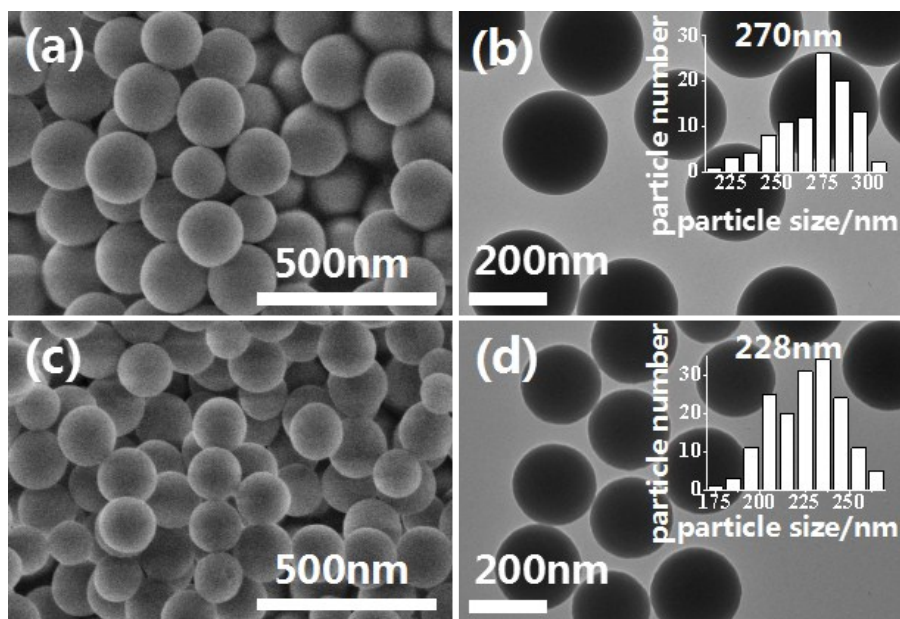

Figure S1. SEM and TEM images of silica nanoparticles obtained from typical Stöber method (a and b named S-1-1), S-1-1 diluted with water to 5 times and then added with ammonia solution to reach to 2.6M (c and d named S-1-5).

Table S1. Textural Characteristics of Calcined parent silica nanoparticles and MSNs Synthesized in Various Reaction Conditions.

| Sample <sup>a</sup> | S <sub>BET</sub> <sup>b</sup><br>(m <sup>2</sup> /g) | V <sub>Total</sub> <sup>c</sup><br>(mL/g) | V <sub>inter</sub> <sup>d</sup><br>(mL/g) | D <sub>BJH</sub> <sup>e</sup><br>(nm) | PSD <sup>f</sup><br>(nm) | Q <sup>2</sup><br>(%) | Q <sup>3</sup><br>(%) | Q <sup>4</sup><br>(%) |
|---------------------|------------------------------------------------------|-------------------------------------------|-------------------------------------------|---------------------------------------|--------------------------|-----------------------|-----------------------|-----------------------|
| P-0.3-1             | 85                                                   | 0.36                                      | 0.069                                     | 17                                    | 140                      | 9.5                   | 33.4                  | 57.1                  |
| M-0.3-5             | 426                                                  | 0.87                                      | 0.26                                      | 3                                     | 113                      | 7.4                   | 32.9                  | 59.7                  |
| P-0.4-1             | 19                                                   | 0.27                                      | 0.017                                     | 56                                    | 180/280                  | -                     | -                     | -                     |
| M-0.4-5             | 418                                                  | 0.65                                      | 0.22                                      | 3                                     | 130/230                  | -                     | -                     | -                     |
| P-1-1               | 7                                                    | 0.11                                      | 0                                         | 60                                    | 320                      | -                     | -                     | -                     |
| S-1-1               | 13                                                   | 0.15                                      | 0.011                                     | 45                                    | 270                      | 2.4                   | 24.2                  | 73.4                  |

<sup>a</sup>P, M and S stand for parent silica, MSNs and silica prepared from Stöber method, the intermediate number representation the initial ammonia concentration, the last digit representation the dilution multiple; <sup>b</sup>S<sub>BET</sub> is the specific surface area measured from N<sub>2</sub> physisorption. <sup>c</sup>V<sub>total</sub> is the total internal pore volume measured at P/P<sub>o</sub> = 0.99. <sup>d</sup>V<sub>inter</sub> is the internal pore volume measured at P/P<sub>o</sub> = 0.80. <sup>e</sup>D<sub>BJH</sub> is the pore diameter calculated from the BJH theoretical model. <sup>f</sup>Particle size distribution (PSD) was determined by measuring the diameters of at least 100 particles under TEM (Figure 1 and Figure 2). Q<sup>2</sup>, Q<sup>3</sup>, Q<sup>4</sup> measured from <sup>29</sup>Si MAS solid-state NMR spectra.

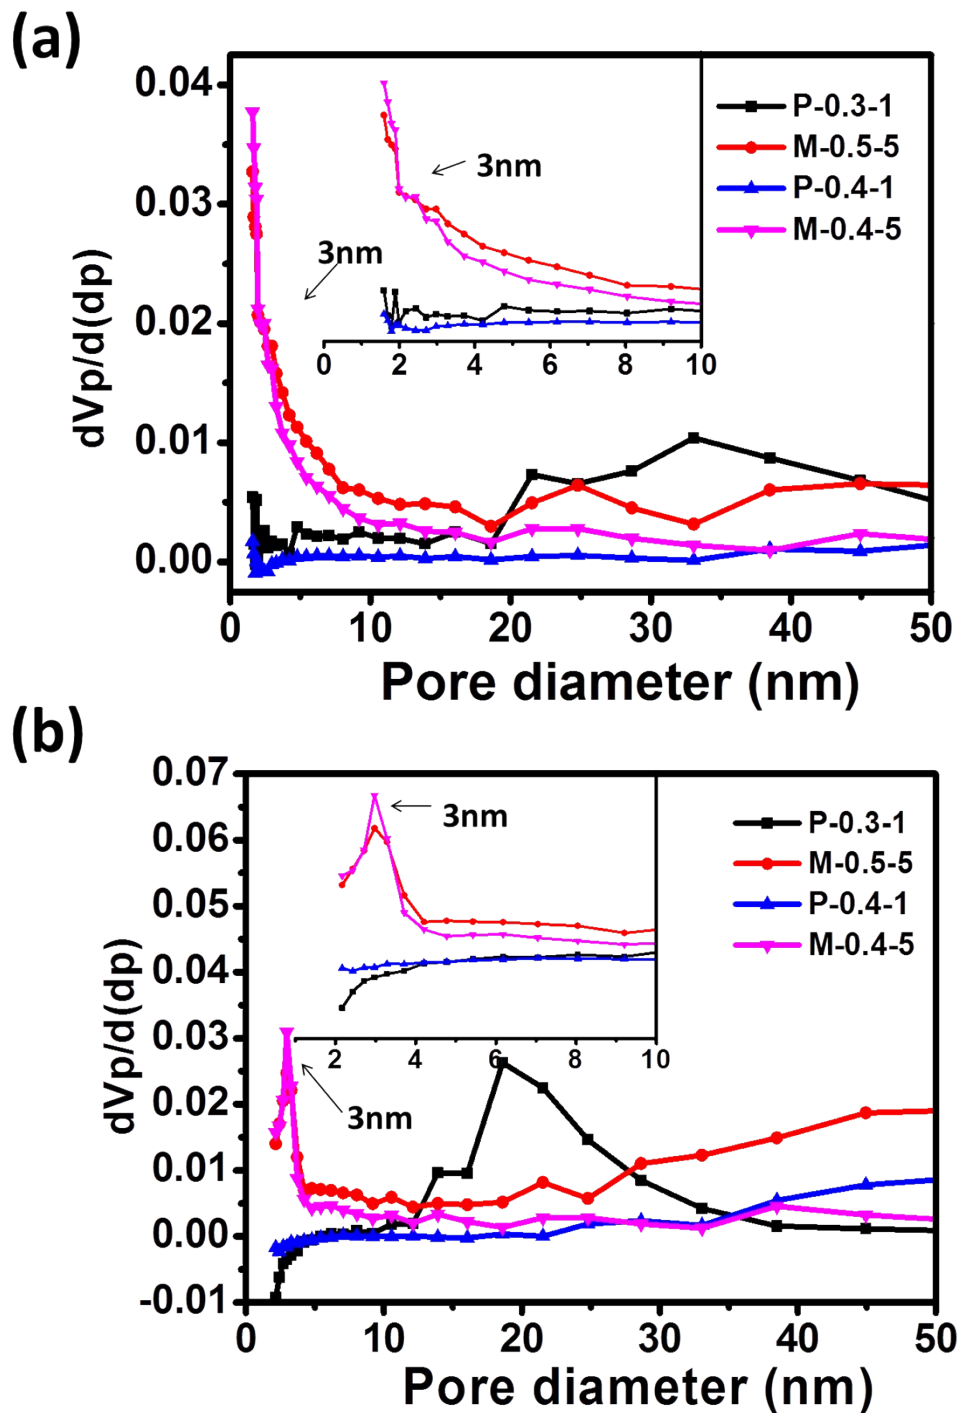

Figure S2. Pore size distribution plots of parent silica nanoparticles and etched MSNs synthesized with different molar of ammonia solution calculated by using the BJH model from adsorption branch (a) and desorption branch (b) respectively.
